# Supplementary material
Source: bioRxiv or medRxiv preprint supplement (https://medrxiv.org/highwire/filestream/94386/field_highwire_adjunct_files/3/2020.08.24.20155713-4.pdf)
Supplement: Supplementary file [file 2020.08.24.20155713-4.pdf]

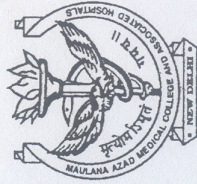

**MAULANA AZAD MEDICAL COLLEGE  
AND ASSOCIATED HOSPITAL**

(Lok Nayak, G.B.Pant Institute of Postgraduate Medical Education and Research  
Hospital, Guru Nanak Eye Centre, & New Delhi - 110002

(INSTITUTIONAL ETHICS COMMITTEE )

F.1/IEC/MAMC/(77/05/2020/No 164

Dated : 5/08/2020

To,

Dr.B.C.Korner  
Professor  
Department of Biochemistry  
Maulana Azad Medical College &  
Associated Hospitals  
New Delhi 110002

Subject: :Grant of Ethics clearance for Research Project "In house assembled protective device in laboratory safety against SARS-n Cov-2 in clinical biochemistry laboratory of a COVID dedicated hospital"

Dear Sir,

With reference to your letter dated 23/07/2020 on the subject cited above, we have received your application for Approval from Ethics Committee of above research project in reference to the study you wish to conduct at MAMC

The Institutional Ethics Committee, MAMC has reviewed and discussed your application to conduct the Research Project entitled "In house assembled protective device in laboratory safety against SARS-n Cov-2 in clinical biochemistry laboratory of a COVID dedicated hospital. The committee has decided to approve the study under the referenced has been exempted.

Yours,

(Dr. M.K. Daga)  
Member Secretary (IEC)

Date: 5/08/2020
